# Supplementary material for: Trehalose Production Using Three Extracellular Enzymes Produced via One-Step Fermentation of an Engineered Bacillus subtilis Strain
Source: MDPI journal article supplement (doi:10.3390/bioengineering10080977), 2023-08-18
Supplement: s1 [file s1]

# Trehalose Production Using Three Extracellular Enzymes Produced via One-Step Fermentation of an Engineered *Bacillus subtilis* Strain

Xi Sun <sup>1,†</sup>, Jun Yang <sup>1,†</sup>, Xiaoping Fu <sup>2,3,†</sup>, Xingya Zhao <sup>4,5</sup>, Jie Zhen <sup>4,5</sup>, Hui Song <sup>2,3,4,5</sup>, Jianyong Xu <sup>2,4,5</sup>, Hongchen Zheng <sup>2,3,4,5,\*</sup> and Wenqin Bai <sup>2,3,\*</sup>

<sup>1</sup> College of Biological Engineering, Tianjin Agricultural University, Tianjin 300384, China; sunxi@tjau.edu.cn (X.S.); yangjun@tib.cas.cn (J.Y.)

<sup>2</sup> National Center of Technology Innovation for Synthetic Biology, Tianjin Institute of Industrial Biotechnology, Chinese Academy of Sciences, Tianjin 300308, China; fu\_xp@tib.cas.cn (X.F.); song\_h@tib.cas.cn (H.S.); xu\_jy@tib.cas.cn (J.X.)

<sup>3</sup> Key Laboratory of Engineering Biology for Low-Carbon Manufacturing, Tianjin Institute of Industrial Biotechnology, Chinese Academy of Sciences, Tianjin 300308, China

<sup>4</sup> Industrial Enzymes National Engineering Research Center, Tianjin Institute of Industrial Biotechnology, Chinese Academy of Sciences, Tianjin 300308, China; zhao\_xy@tib.cas.cn (X.Z.); zhen\_j@tib.cas.cn (J.Z.)

<sup>5</sup> Tianjin Key Laboratory for Industrial Biological Systems and Bioprocessing Engineering, Tianjin Institute of Industrial Biotechnology, Chinese Academy of Sciences, Tianjin 300308, China

\* Correspondence: zheng\_hc@tib.cas.cn (H.Z.); baiwq@tib.cas.cn (W.B.); Tel.: +86-022-84861933 (H.Z.)

† These authors contributed equally to this work.

**Table S1.** Strains and plasmids used in this study.

| Strains and plasmids          | description                                                                                                                                                                                                                                                                              | source       |
|-------------------------------|------------------------------------------------------------------------------------------------------------------------------------------------------------------------------------------------------------------------------------------------------------------------------------------|--------------|
| <b>Strains</b>                |                                                                                                                                                                                                                                                                                          |              |
| <i>E. coli</i> BL21(DE3) TrxB | F <sup>-</sup> omp <sup>T</sup> <i>hsdS<sub>B</sub></i> ( <i>r<sub>B</sub>m<sub>B</sub></i> ) <i>gal dcm trxB</i> 15::kan (DE3)                                                                                                                                                          | Our lab.     |
| <i>B. subtilis</i> SCK6       | Erm <sup>R</sup> , <i>his</i> , <i>nprR2</i> , <i>nprE18</i> , $\Delta$ <i>aprA3</i> , $\Delta$ <i>eglS102</i> , $\Delta$ <i>bglT/bglSRV</i> , <i>lacA::PxylA-comK</i>                                                                                                                   | Our lab.     |
| <i>E. coli</i> DH5 $\alpha$   | F <sup>-</sup> , $\phi$ 80, <i>lacZ</i> $\Delta$ M15, $\Delta$ ( <i>lacZYA</i> -argF) U169 <i>endA1</i> , <i>recA1</i> , <i>hsdR17</i> (r <sup>-</sup> , m <sup>+</sup> ) <i>supE44</i> , $\lambda$ <sup>-</sup> , <i>thi</i> <sup>-1</sup> , <i>gyrA96</i> , <i>relA1</i> , <i>phoA</i> | Our lab.     |
| <b>Plasmids</b>               |                                                                                                                                                                                                                                                                                          |              |
| pMA05                         | Amp <sup>r</sup> ( <i>E. coli</i> ), Kan <sup>r</sup> ( <i>B. subtilis</i> ), P <sub>hapII</sub> , <i>B. subtilis</i> - <i>E. coli</i> shuttle plasmid                                                                                                                                   | Our lab.     |
| pMC68                         | Amp <sup>r</sup> ( <i>E. coli</i> ), Kan <sup>r</sup> ( <i>B. subtilis</i> ), P <sub>hapII</sub> , CBM68 structural domain, <i>B. subtilis</i> - <i>E. coli</i> shuttle plasmid                                                                                                          | Our lab.     |
| pHT43                         | Amp <sup>r</sup> ( <i>E. coli</i> ), Chl <sup>r</sup> ( <i>B. subtilis</i> ), <i>lacO</i> , <i>B. subtilis</i> - <i>E. coli</i> shuttle plasmid                                                                                                                                          | Our lab.     |
| pET32a                        | Amp <sup>r</sup> , T7lac promoter, Trx•Tag <sup>TM</sup> (N), His•Tag (I,C) and S•Tag (I)                                                                                                                                                                                                | Our lab.     |
| pET32a-ARS                    | pET32a containing the MTSase gene from <i>Arthrobacter ramosus</i> S34                                                                                                                                                                                                                   | In this work |

|                      |                                                                                                                                                                                                                                                        |              |
|----------------------|--------------------------------------------------------------------------------------------------------------------------------------------------------------------------------------------------------------------------------------------------------|--------------|
| pET32a-SAS           | pET32a containing the MTSase gene from<br><i>Sulfolobus acidocaldarius</i> ATCC33909                                                                                                                                                                   | In this work |
| pET32a-SSS           | pET32a containing the MTSase gene from<br><i>Sulfolobus solfataricus</i> KM1                                                                                                                                                                           | In this work |
| pET32a-ARH           | pET32a containing the MTHase gene from<br><i>Arthrobacter ramosus</i> S34                                                                                                                                                                              | In this work |
| pET32a-SAH           | pET32a containing the MTHase gene from<br><i>Sulfolobus acidocaldarius</i> ATCC33909                                                                                                                                                                   | In this work |
| pET32a-SSH           | pET32a containing the MTHase gene from<br><i>Sulfolobus solfataricus</i> KM1                                                                                                                                                                           | In this work |
| pMC68-ARS            | pMC68 containing the MTSase gene from<br><i>Arthrobacter ramosus</i> S34                                                                                                                                                                               | In this work |
| pMC68-ARH            | pMC68 containing the MTHase gene from<br><i>Arthrobacter ramosus</i> S34                                                                                                                                                                               | In this work |
| pHT43-C68-ARS        | pMC68 containing CBM68 structural domain and<br>the MTSase gene from <i>Arthrobacter ramosus</i> S34                                                                                                                                                   | In this work |
| pHT43-C68-ARH        | pMC68 containing CBM68 structural domain and<br>the MTHase gene from <i>Arthrobacter ramosus</i><br>S34                                                                                                                                                | In this work |
| pDG1730-amyE-<br>ARS | Bacillus subtilis integrative plasmid, Amp <sup>r</sup> ( <i>E. coli</i> ), Spc <sup>r</sup> ( <i>B. subtilis</i> ), upstream and downstream<br>homologous genes containing <i>amyE</i> sites, the<br>MTSase gene from <i>Arthrobacter ramosus</i> S34 | In this work |
| pDG1730-amyE-<br>ARH | Bacillus subtilis integrative plasmid, Amp <sup>r</sup> ( <i>E. coli</i> ), Spc <sup>r</sup> ( <i>B. subtilis</i> ), upstream and<br>downstream homologous genes containing <i>amyE</i><br>sites, the MTHase gene from <i>Arthrobacter ramosus</i> S34 | In this work |
| pDG1730-nprB-<br>ARS | Bacillus subtilis integrative plasmid, Amp <sup>r</sup> ( <i>E. coli</i> ), Spc <sup>r</sup> ( <i>B. subtilis</i> ), upstream and downstream<br>homologous genes containing <i>nprB</i> sites, the<br>MTSase gene from <i>Arthrobacter ramosus</i> S34 | In this work |
| pDG1730-nprB-<br>ARH | Bacillus subtilis integrative plasmid, Amp <sup>r</sup> ( <i>E. coli</i> ), Spc <sup>r</sup> ( <i>B. subtilis</i> ), upstream and downstream<br>homologous genes containing <i>nprB</i> sites, the<br>MTHase gene from <i>Arthrobacter ramosus</i> S34 | In this work |
| pDG1730-ytxE-<br>ARS | Bacillus subtilis integrative plasmid, Amp <sup>r</sup> ( <i>E. coli</i> ), Spc <sup>r</sup> ( <i>B. subtilis</i> ), upstream and downstream<br>homologous genes containing <i>ytxE</i> sites, the<br>MTSase gene from <i>Arthrobacter ramosus</i> S34 | In this work |
| pDG1730-ytxE-<br>ARH | Bacillus subtilis integrative plasmid, Amp <sup>r</sup> ( <i>E. coli</i> ), Spc <sup>r</sup> ( <i>B. subtilis</i> ), upstream and downstream<br>homologous genes containing <i>ytxE</i> sites, the<br>MTHase gene from <i>Arthrobacter ramosus</i> S34 | In this work |

**Table S2. Primers used in this study.**

| Primer name   | Sequence (5'-3')                                            |
|---------------|-------------------------------------------------------------|
| 32a-F         | GATCCGGCTGCTAACAAAGC                                        |
| 32a-R         | CATGGCCTTGTCGTCGTC                                          |
| 32a-ARS-F     | TACCGACGACGACGACAAGGCCATGGTTCCGGCAAGCACATATA<br>GAC         |
| 32a-ARS-R     | TTCGGGCTTTGTTAGCAGCCGGATCTTAGTGATGATGATGATGATG<br>TGTTTCGAC |
| 32a-SAS-F     | TACCGACGACGACGACAAGGCCATGGTTATTAGCGCAACATATCG<br>CCT        |
| 32a-SAS-R     | TTCGGGCTTTGTTAGCAGCCGGATCTCAATGGTGGTGGTGGTGGT<br>GCTCG      |
| 32a-SSS-F     | TACCGACGACGACGACAAGGCCATGATGATCATTGGCACATATCG<br>CC         |
| 32a-SSS-R     | TTCGGGCTTTGTTAGCAGCCGGATCTTAGTGATGGTGGTGATGAT<br>GTTTCG     |
| 32a-ARH-F     | TACCGACGACGACGACAAGGCCATGATGAATCGCAGATTTCAG<br>TTTGG        |
| 32a-ARH-R     | TTCGGGCTTTGTTAGCAGCCGGATCTTAGTGATGGTGATGATGAT<br>GTTCCAG    |
| 32a-SAH-F     | TACCGACGACGACGACAAGGCCATGATGTTTACGCTTTGGCGGC                |
| 32a-SAH-R     | TTCGGGCTTTGTTAGCAGCCGGATCTTAGTGGTGATGGTGATGAT<br>GTTCCA     |
| 32a-SSH-F     | TACCGACGACGACGACAAGGCCATGATGACGTTTGCCTACAAGA<br>TCG         |
| 32a-SSH-R     | TTCGGGCTTTGTTAGCAGCCGGATCTTAGTGGTGATGGTGGTGAT<br>GCA        |
| pMC68-F       | GCTAGCTTGGTACGTACCAGATC                                     |
| pMC68-R       | ACCAAGATCATTTCGTCATATGCATAC                                 |
| pMC68-ARS-F   | TGCATATGACGGAAATGATCTTGGTGTCCGGCAAGCACATATAG<br>AC          |
| pMC68-ARS-R   | CAGATCTGGTACGTACCAAGCTAGCTTAGTGATGATGATGATGAT<br>GTGTTTCGAC |
| pMC68-ARH-F   | TGCATATGACGGAAATGATCTTGGTATGAATCGCAGATTTCAGTT<br>TGG        |
| pMC68-ARH-R   | CAGATCTGGTACGTACCAAGCTAGCTTAGTGATGGTGATGATGAT<br>GTTCCAG    |
| pHT43-F       | AGCCCGCCTAATGAGC                                            |
| pHT43-R       | TGATCCTTCCTCCTTTAATTGGGAAT                                  |
| pHT43-CBM68-F | TTCCCAATTAAAGGAGGAAGGATCAATGCCCCCAAAACAACAGT<br>CG          |

|                         |                                                                                             |
|-------------------------|---------------------------------------------------------------------------------------------|
| pHT43-CBM68-R           | GCAGTCTATATGTGCTTGCCGGAACACCAAGATCATTTCGTCATA<br>TGCATAC                                    |
| pHT43-ARS-F             | TGCATATGACGGAAATGATCTTGGTGTTCGGCAAGCACATATAG<br>AC                                          |
| pHT43-ARS-R             | CGCTCATTAGGCGGGCTGCCCCGGGTAGTGATGATGATGATGAT<br>GTGTTTCGAC                                  |
| pHT43-ARH-F             | TGCATATGACGGAAATGATCTTGGTATGAATCGCAGATTCCAGTT<br>TGG                                        |
| pHT43-ARH-R             | CGCTCATTAGGCGGGCTGCCCCGGGTAGTGATGGTGATGATGAT<br>GTTCCAG                                     |
| <i>pDG1730-F</i>        | GGGCAAGGCTAGACGGGAC                                                                         |
| <i>pDG1730-R</i>        | TCTTGACACTCCTTATTTGATTTTTTG                                                                 |
| <i>1730-amyE-up-F</i>   | CAAAAAATCAAATAAGGAGTGTCAAGAATGTTTGCAAAACGATT<br>CAAAACCTC                                   |
| <i>1730-amyE-up-R</i>   | AATCAGCAAGGGACAGGTAGTACCGAAGCTTCTAGGATCCGATC<br>AGACCAG                                     |
| <i>Hpa II-F</i>         | TACTACCTGTCCCTTGCTGATTTTT                                                                   |
| <i>Hpa II-R</i>         | GATCTGCATCCGCTTACAGACA                                                                      |
| <i>Spc-F</i>            | CTGTAAGCGGATGCAGATCATCGAATTCCTGCAGCCCTG                                                     |
| <i>Spc-R</i>            | GATCCCCCTATGCAAGGGTTTATTG                                                                   |
| <i>1730-amyE-down-F</i> | CAATAAACCCCTTGCATAGGGGGATCTCGACATGGATGAGCGATGA<br>TG                                        |
| <i>1730-amyE-down-R</i> | GTCCCGTCTAGCCTTGCCCTCAATGGGGAAGAGAACCGCTTAAG<br>CAAAAAATCAAATAAGGAGTGTCAAGAGTTTTCCCTTAAACAA |
| <i>1730-nprB-up-F</i>   | ATATTTGAACACGATTTTGGC                                                                       |
| <i>1730-nprB-up-R</i>   | AATCAGCAAGGGACAGGTAGTACCGGCAAACAAAAACAGTCAG<br>GACA                                         |
| <i>1730-nprB-down-F</i> | CAATAAACCCCTTGCATAGGGGGATCATGAAACGAATCAAGTTAA<br>TGACCGC                                    |
| <i>1730-nprB-down-R</i> | GTCCCGTCTAGCCTTGCCCAACACCACATCCTTCCTATTTTGAAT<br>CTACC                                      |
| <i>1730-ytxE-up-F</i>   | CAAAAATCAAATAAGGAGTGTCAAGACTGACCTCTTCTTCATCG<br>TAACAGG                                     |
| <i>1730-ytxE-up-R</i>   | AATCAGCAAGGGACAGGTAGTACCGTGCAGATCGATTTGGG                                                   |
| <i>1730-ytxE-down-F</i> | CAATAAACCCCTTGCATAGGGGGATCGGATAACAAGACAAATGAA<br>CACATGAAGG                                 |
| <i>1730-ytxE-down-R</i> | GTCCCGTCTAGCCTTGGAGAGCATCAGGATTCTGCATATACA                                                  |

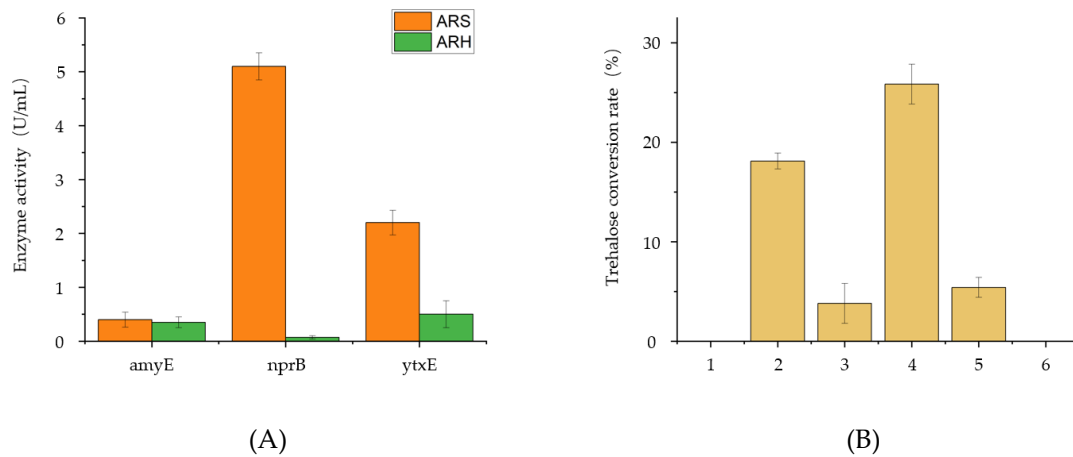

**Figure S1. Expression of ARS and/or ARH by genome integration in *B. subtilis* SCK6.** A. Enzyme activities of the recombinant ARS or ARH by genome integration in different positions of *B. subtilis* SCK6 genome. B. Trehalose conversion rates of the extracellular multi-enzyme produced by different co-expression genome integration strains. 1: the genome integration strain that inserted encoding genes of ARS and ARH into *amyE* and *nprB* locations of the genome, respectively; 2: the genome integration strain that inserted encoding genes of ARS and ARH into *amyE* and *ytxE* locations of the genome, respectively; 3: the genome integration strain that inserted encoding genes of ARS and ARH into *nprB* and *amyE* locations of the genome, respectively; 4: the genome integration strain that inserted encoding genes of ARS and ARH into *nprB* and *ytxE* locations of the genome, respectively; 5: the genome integration strain that inserted encoding genes of ARS and ARH into *ytxE* and *amyE* locations of the genome, respectively; 6: the genome integration strain that inserted encoding genes of ARS and ARH into *ytxE* and *nprB* locations of the genome, respectively.

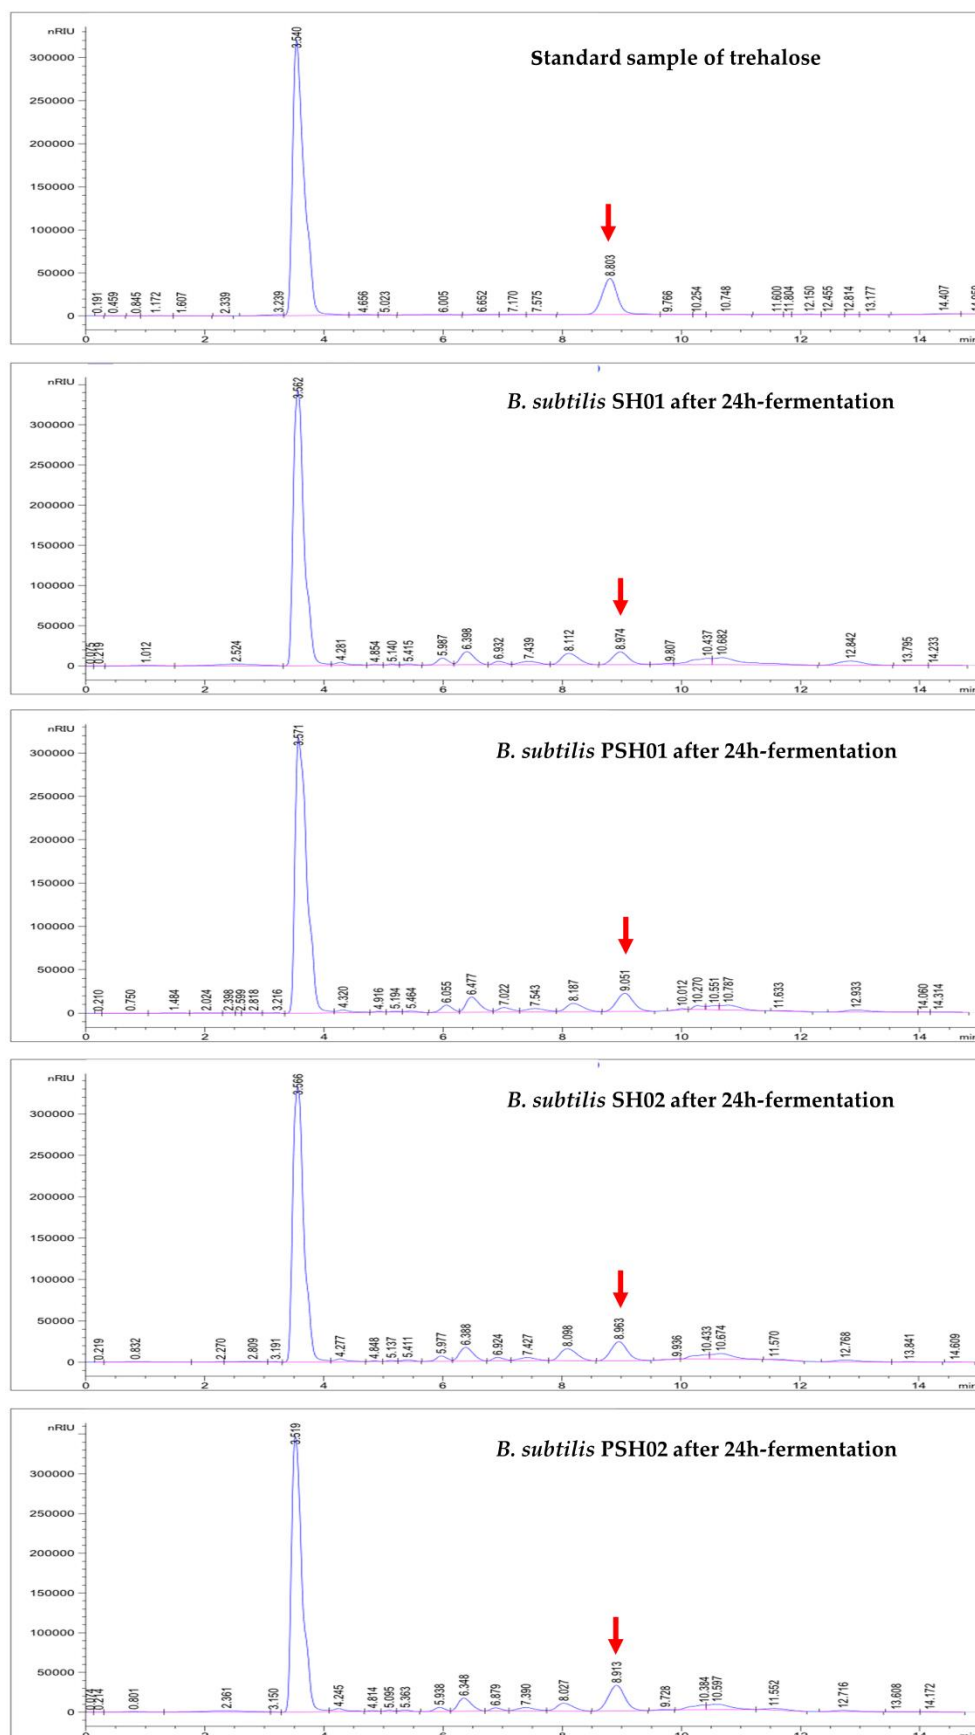

**Figure S2. The HPLC chromatograms of extracellular enzymes solutions produced constructed strains. Chromatogram of trehalose standard sample with a concentration of 10**

mg/mL. The detection peak was shown at 8.803 min in the topside map. Using 10 mg/mL maltodextrin as the substrate, extracellular enzymes solutions after 24 h cell-fermentations were prepared and added for reactions. Productions were detected and the chromatogram maps were presented in the order of strains *B. subtilis* SH01, PSH01, SH02, PSH02 from top to bottom with determination peak of 8.974 min, 9.051 min, 8.963 min, 8.913 min correspondingly.

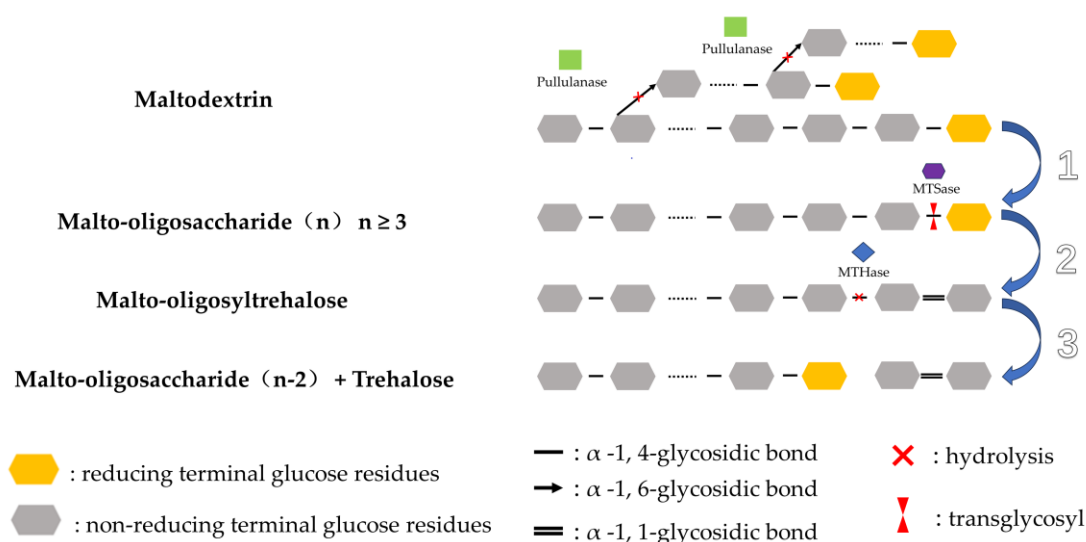

**Figure S3. Converting pathway from maltodextrin to trehalose by double enzymes system.**

In step 1, pullulanase was added as an assistant enzyme to recognize and cut the  $\alpha$ -1,6 glycosidic bond of maltodextrin. This reaction created more reducing ends to be transglycosylated by MTSase in step 2 and produced malto-oligosyltrehalose to be the substrate for next step. In step 3, MTHase hydrolysed the penult end of the long chain, resulting Trehalose and malto-oligosyltrehalose chain lacking two glycosyl groups.
